## RESEARCH ARTICLE

# Unveiling immune cell response disparities in human primary cancer-associated fibroblasts between two- and three-dimensional cultures

Jian-Ping Yang<sup>1\*</sup>, Nikhil Nitin Kulkarni<sup>1</sup>, Masashi Yamaji<sup>1</sup>, Tsubasa Shiraishi<sup>2</sup>, Thang Pham<sup>3</sup>, Han Do<sup>3</sup>, Nicole Aiello<sup>4</sup>, Michael Shaw<sup>5</sup>, Toshihiro Nakamura<sup>2</sup>, Akiko Abiru<sup>2</sup>, Narendra R. Gavva<sup>1</sup>, Shane R. Horman<sup>1</sup>

**1** Takeda Development Center Americas, Inc., San Diego, California, United States of America, **2** Takeda Pharmaceutical Company Ltd, Fujisawa, Kanagawa, Japan, **3** BioTuring, San Diego, California, United States of America, **4** Bristol-Myers Squibb, Princeton, New Jersey, United States of America, **5** Takeda Development Center Americas, Inc., Cambridge, Massachusetts, United States of America

\* [jpy8888@yahoo.com](mailto:jpy8888@yahoo.com)

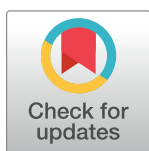

## OPEN ACCESS

**Citation:** Yang J-P, Kulkarni NN, Yamaji M, Shiraishi T, Pham T, Do H, et al. (2024) Unveiling immune cell response disparities in human primary cancer-associated fibroblasts between two- and three-dimensional cultures. *PLoS ONE* 19(12): e0314227. <https://doi.org/10.1371/journal.pone.0314227>

**Editor:** Zhiming Li, Sichuan University, CHINA

**Received:** August 22, 2024

**Accepted:** November 6, 2024

**Published:** December 19, 2024

**Peer Review History:** PLOS recognizes the benefits of transparency in the peer review process; therefore, we enable the publication of all of the content of peer review and author responses alongside final, published articles. The editorial history of this article is available here: <https://doi.org/10.1371/journal.pone.0314227>

**Copyright:** © 2024 Yang et al. This is an open access article distributed under the terms of the [Creative Commons Attribution License](https://creativecommons.org/licenses/by/4.0/), which permits unrestricted use, distribution, and reproduction in any medium, provided the original author and source are credited.

**Data Availability Statement:** The SnRNA-seq data supporting this publication are available at <https://doi.org/10.6084/m9.figshare.27289656>.

## Abstract

Cancer-associated fibroblasts (CAFs) play pivotal roles in solid tumor initiation, growth, and immune evasion. However, the optimal biomimetic modeling conditions remain elusive. In this study, we investigated the effects of 2D and 3D culturing conditions on human primary CAFs integrated into a modular tumor microenvironment (TME). Using single-nucleus RNA sequencing (snRNAseq) and Proteomics' Proximity Extension Assays, we characterized CAF transcriptomic profiles and cytokine levels. Remarkably, when cultured in 2D, CAFs exhibited a myofibroblast (myCAF) subtype, whereas in 3D tumor spheroid cultures, CAFs displayed a more inflammatory (iCAF) pathological state. By integrating single-cell gene expression data with functional interrogations of critical TME-related processes [natural killer (NK)-mediated tumor killing, monocyte migration, and macrophage differentiation], we were able to reconcile form with function. In 3D TME spheroid models, CAFs enhance cancer cell growth and immunologically shield cells from NK cell-mediated cytotoxicity, in striking contrast with their 2D TME counterparts. Notably, 3D CAF-secreted proteins manifest a more immunosuppressive profile by enhancing monocyte transendothelial migration and differentiation into M2-like tumor-associated macrophages (TAMs). Our findings reveal a more immunosuppressive and clinically relevant desmoplastic TME model that can be employed in industrial drug discovery campaigns to expand the cellular target range of chemotherapeutics.

## Introduction

In recent years, the tumor microenvironment (TME) has emerged as a focal point in cancer research, influencing immune responses, metastasis, and therapeutic outcomes [1–3]. Comprising a complex network of components, the TME includes tumor cells, infiltrating immune cells (such as macrophages, dendritic cells, and lymphocytes), cancer-associated stromal cells

**Funding:** The author(s) received no specific funding for this work.

**Competing interests:** The authors have declared that no competing interests exist.

(notably, cancer-associated fibroblasts or CAFs), and other cell types, as well as non-cellular elements, such as the extracellular matrix (ECM) and soluble factors secreted by different cell types. Non-malignant cells within the TME exhibit genomic stability, but remain adaptable. Their transcriptomes and phenotypes are shaped by their interactions with cancer cells and other TME components [4, 5].

CAFs are the main stromal components of solid tumors [6, 7]. Under basal homeostatic conditions, fibroblasts maintain a tissue equilibrium and facilitate essential cell communication. However, when activated by factors secreted from cancer or immune cells, fibroblasts undergo a transformative shift, suggesting a role for CAFs<sup>143, 169</sup>. These activated CAFs exhibit remarkable biological heterogeneity due to their diverse origins, phenotypes, and functional molecules. Even within a single tumor, CAFs may consist of diverse subpopulations, each with distinct functions. Recent investigations of CAF signaling networks have defined subtypes according to function: myofibroblastic CAFs (myCAFs), which are involved in ECM maintenance and wound healing regulation; inflammatory/immune regulatory CAFs (iCAF), characterized by their secretory phenotype and immune cell regulatory activity; and antigen-presenting CAFs (apCAFs), which express MHC class II molecules [8, 9]. Each of these CAF subtypes has a significant influence on the TME, particularly through their properties of immunomodulation. By interacting with cancer and immune components, CAFs contribute to immunosuppression and surveillance escape, orchestrating a delicate balance that affects tumor progression and response to therapy [10].

CAFs actively shape the TME by remodeling the organ's extracellular matrix and releasing an array of cytokines and chemokines that facilitate accessory cells to do the same [11, 12]. Their intricate dance with cancer cells, often described as "partners in crime", fuels tumor growth, angiogenesis, inflammation, and drug resistance [13, 14]. Numerous studies have identified CAFs as viable targets for clinical intervention [15, 16]. Therefore, understanding the dynamic interplay among cancer cells, CAFs, and immune cells is crucial for innovative CAF-targeted drug development [17, 18].

However, several challenges have hindered our progress in the study and development of therapeutic strategies that target CAFs. CAFs exhibit remarkable heterogeneity in their origin and function, which complicates modulation for therapeutic benefits [19, 20]. Additionally, the lack of validated *in vitro* cell culture systems specifically tailored for studying human CAF biology remains a critical gap in preclinical evaluation of therapeutic efficacy.

Although conventional 2D cell culture methods remain the industry standard for drug discovery owing to their simplicity and scalability, they fail to accurately represent *in vivo* behavior [21, 22]. Cell-to-substrate contacts in 2D (as opposed to cell-to-cell contacts in 3D) induce altered phenotypes that diverge from the complex *in vivo* milieu. Traditionally, animal models have been used to assess drug efficacy and toxicity. However, animal tumor growth studies may not fully mimic human tumor biology [23]. In addition, animal models have various issues, such as substantial costs, logistical demands, limited bioavailability, and ethical concerns.

3D culture is a unique technology that enables intricate tumor-immune interactions through the hierarchical organization of TME cell types within a microtumor spheroid [24, 25]. By co-culturing multiple cell types in 3D microtumors (neoplastic epithelial cells, primary patient-derived CAFs, and primary human immune cells), we gained critical insights into cellular dynamics within the TME [26] which may reveal novel therapeutic targets and biomarkers. Given that new medicines no longer require animal testing for U.S. Food and Drug Administration (FDA) approval [27], enhancing preclinical models with greater complexity, such as organoids [28] and organ-in-a-chip systems [29], to mimic the *in vivo* TME would significantly facilitate the drug development process.

In this study, we meticulously explored various *in vitro* culture methods for patient-derived human primary CAFs to identify an *in vitro* CAF model that faithfully mimicked the clinical interactions between CAFs, cancer cells, and immune cells. Armed with single-nucleus RNA sequencing (snRNAseq) and highly sensitive proteomics detection, we characterized transcriptomic profiles of primary pancreatic cancer patient CAFs cultured in 2D and 3D monoculture and co-cultures with pancreatic cancer cells. We showed that different CAF culture conditions have profound effects on antitumor function and polarization of natural killer (NK) cells.

These findings may be applied to the standardization and employment of next-generation *ex vivo* human tumor models to enhance our knowledge of cancer biology and represent clinically relevant platforms for the evaluation of therapeutic efficacy.

## Material and methods

### Antibodies and reagents

The primary antibodies used for flow cytometry, immunofluorescence, immunohistochemistry, and immunoblotting were CD206 (Cat. no. 321104; BioLegend), CD163 (Cat. no. 333606; BioLegend),  $\alpha$ -SMA (Cat. no. ab5694, Abcam), and GAPDH (Cat#: 5174; Cell Signaling Technology). CD14 microbeads (Cat. no. 130-050-201, Miltenyi Biotec) were used to sort monocytes. Butylated hydroxyanisole (BHA) was purchased from Sigma–Aldrich.

### Cell cultures

Human pancreatic CAF-Stellate Cells were purchased from Neuromics and cultured in CAF growth media (Neuromics). BxPC3\_Red\_luc cells were cultured in RPMI1640 or Dulbecco's Minimal Essential Medium supplemented with 10% fetal bovine serum.

### SnRNAseq and Olink panel analysis

For 2D cultures,  $5 \times 10^5$  human pancreatic CAFs or a mix of  $1 \times 10^5$  BxPC3 (RRID:CVCL\_XX78) cancer cells and  $3 \times 10^5$  pancreatic CAFs per well were cultured in 6-well plates in 2 ml RPMI 1640 with 0.5% fetal bovine serum (FBS) culture media for monoculture and co-culture, respectively. For 3D culture,  $2 \times 10^4$  pancreatic CAFs or a mix of a mix of  $0.5 \times 10^4$  BxPC3 cells with  $1.5 \times 10^4$  pancreatic CAFs per well were seeded in 100  $\mu$ L of RPMI 1640 with 0.5% FBS culture medium in 96-well round-bottom, ultra-low attachment plates (Corning Inc., New York, USA), centrifuged at  $500 \times g$  for five minutes then placed in a  $37^\circ\text{C}$  incubator at 5%  $\text{CO}_2$  for 2 days. The cells and spheroids were harvested, washed with DPBS, and frozen for RNA-seq analysis. Supernatants were collected and centrifuged to remove cell debris for Olink analysis. The quality control (QC) for single-nucleus RNA sequencing (snRNAseq) data analysis is provided in [S1 Fig](#).

### Tumor cell growth measurement

$5 \times 10^3$  BxPC3 mCherry-luciferase reporter cells were monocultured or co-cultured with  $1 \times 10^4$  CAFs in flat-bottom or ultra-low attachment 96-well plates for 2D and 3D cultures, respectively. The Incucyte live-cell imaging platform (Sartorius) tracked BxPC3 killing over a period of 5 days for both 2D and 3D cultures. At the end of the imaging, the BxPC3 residual cell count was assessed using the Bright-Glo luciferase system (Cat. No. E2620, Promega) on the GloMax plate reader (Promega).

### NK cell cytotoxicity assay

Primary peripheral blood human NK cells were acquired from healthy nonsmoking donors (Cat. no.70036, Stem Cell Technologies). NK cells were cultured in CTS NK Xpander medium (Cat. No. A5019001, ThermoFisher Scientific), supplemented with 5% human AB serum (Cat. No.H4522, Sigma Aldrich), and 200 ng/ml IL-2 (Cat. no. 202-IL-010; R and D Biosystems) for 48 h post thaw to generate activated NK cells.

For the NK cell killing assay, IL2 activated NK cells were cultured with either BxPC3 pancreatic adenocarcinoma cells or co-cultured BxPC3 and CAF cells in both monolayer 2D and spheroid 3D format in 96 well tissue culture plates (Cat. No. 3595 and 4520, Corning), as described in the section on tumor growth measurements. Effector (NK cells) to target (BxPC3) ratios of 5:1, 2.5:1, 1.25:1, and 0.625:1 were used in the NK cell killing assay. The Incucyte live-cell imaging platform (Sartorius) tracked BxPC3 killing over a period of 7 days for both 2D and 3D cultures. At the end of the imaging, the BxPC3 residual cell count was assessed using the Bright-Glo luciferase system (Cat. No. E2620, Promega) on the GloMax plate reader (Promega).

### CAF condition media generation

Human pancreatic CAFs were cultured in the CAF growth medium (Cat. No. CAFM03, NeuroMics). A total CAF cell density of  $0.335 \times 10^6$  cells/ml was maintained for both monolayer (2D) and spheroid (3D) CAF culture. A total of  $1.34 \times 10^6$  cells were cultured in 4 ml reduced serum medium (RPMI-1640, 2 mM glutamine, and 0.5% Fetal Calf Serum) in each well of Aggrewell 800 (Cat. no. 34825; Stem Cell Technologies) for 3D culture with 900 cells seeded per microcavity. The 6-well Aggrewell microcavity plate was briefly centrifuged at  $300 \times g$  for 2 min to allow CAF spheroid formation. For 2D CAF culture,  $0.668 \times 10^6$  cells were cultured in 2 ml reduced serum medium in each well of a 6 well tissue culture plate (Cat. No. 140675, Nunc Delta, ThermoFisher Scientific). Conditioned supernatant was collected 72 h post CAF culture for both 2D and 3D, filtered through a 40- $\mu$  cell strainer, and frozen at  $-80^\circ\text{C}$ .

### Monocyte purification

Leukocytes were obtained from healthy volunteers. Monocytes were isolated using CD14 negative selection methods by Robosep from StemCell. The purity and recovery of CD14+ monocytes were determined using CD14-FITC antibody labeling (Cat. no. 130-113-708; Miltenyi Biotec), whereas cell viability was determined by propidium iodide (PI) staining and flow cytometry analysis using a BD FACSAria III (BD Biosciences, San Jose, CA, USA).

### Monocyte transendothelial migration assay

Human endothelial cells (HUVECs, RRID:CVCL\_2959) were purchased from StemCells and cultured in EBM<sup>TM</sup>-2 Endothelial Cell Growth Basal Medium-2 supplemented with 5% fetal bovine serum (FBS), hydrocortisone, human fibroblast growth factor-beta (hFGF-b), vascular Endothelial Growth Factor (VEGF), R3-Insulin-like growth factor-1 (R3-IGF-1), ascorbic acid, epidermal growth factor (hEGF), and gentamicin/amphotericin-B (GA). IncuCyte Clear-View 96-Well Chemotaxis Cell Migration Plates were coated with 5 mg/mL fibronectin diluted with D-PBS, and 8000 HUVECs per well were seeded into the top chamber of a Transwell and incubated overnight to form a confluent monolayer. Subsequently, monocytes pre-stained with the green CellTracker dye were added to the top chamber. Monocyte migration was monitored by imaging the top and bottom membranes of cells in an incubator. Quantitative data demonstrated that conditioned media from 3D CAFs significantly enhanced monocyte

transendothelial migration compared to that from 2D CAFs. Fluorescent labeling of monocytes and chemotaxis plate preparation with HUVEC monolayers. Real-time analysis using the IncuCyte® S3 live-cell imaging system, image analysis, and assessment of the transendothelial migration rates. CCL2 (100 ng/ml) was used as a positive control.

### Macrophage differentiation and polarization

Monocytes were isolated from the leukopaks of healthy non-smoking donors (cat. no. 70500.2, Stem Cell Technologies), using the Easy Sep Human Monocyte Isolation Kit (Cat. 19356 RF, Stem Cell Technologies) on a RoboSep cell isolation automated platform (Stem Cell Technologies), according to the manufacturer's instructions. The purity of the isolated monocytes was verified using flow cytometry (CD14<sup>+</sup> CD15<sup>-</sup>). Monocytes were cryopreserved in Cryosort CS10 (Cat. no. 210502; Biolife Solutions).

Frozen monocytes were thawed and cultured in Immunocult SF Macrophage Medium (Cat. no. 10961, Stem Cell Technologies). A total of  $0.5 \times 10^6$  cells were seeded in each well of 12 well tissue culture treated plate in 500  $\mu$ L medium. Conditioned medium (500  $\mu$ L) from the 2D or 3D CAF cultures was added to 50% of the total volume. The effect of CAF-conditioned medium on macrophage differentiation and polarization was assessed 48-h and 7 d after CAF-conditioned medium treatment. On days 2 and 7, cells were harvested using Accutase (Cat. No. 00-4555-56, Thermo Fisher Scientific) and analyzed using flow cytometry.

### Flow cytometry

Macrophages were washed with 1X DPBS and stained with fixable aqua (Cat. No. L34957) at 1:1000 dilution in 1X DPBS for 15 min. The cells were washed with FCS staining buffer (Cat. N0.554647; BD Biosciences), and incubated with an Fc receptor blocker (Cat. No.422302; BioLegend) for 10 min. Primary conjugated antibodies (S1 Table) were incubated for 20 min in the dark at room temperature. IgG controls were included in all antibodies (S2 Table). Following incubation with the primary antibody, cells were washed with FCS buffer. The cells were incubated for 30 min at 4 C in the dark. The cells were then washed twice with FCS buffer (800 g, 2 min). For intracellular CD68 staining, 100  $\mu$ L fixation/permeabilization solution was added to the cells for 20 min. Next, the cells were washed twice with 1 $\times$  BD Perm/Wash Buffer. CD68 antibody was added at a 1:100 dilution in Perm/Wash buffer, and the cells were incubated at RT for 30 min in the dark. Cells were washed twice in perm/wash buffer and resuspended in Staining FCS Buffer prior to flow cytometric analysis. The cells were analyzed using an Attune Nxt flow cytometer (ThermoFisher Scientific). The gating strategies employed for the FACS analysis of macrophage phenotypes were as follows: dead cells were excluded from the analysis; monocyte-derived macrophages were gated as M1 (CD45<sup>+</sup> CD14<sup>lo/-</sup> CD11b<sup>+</sup> CD80<sup>high/+</sup> CD86<sup>high/+</sup>), M2a (CD45<sup>+</sup> CD14<sup>+</sup> CD11b<sup>+</sup> CD206<sup>high/+</sup>), and M2c (CD45<sup>+</sup> CD14<sup>+</sup> CD11b<sup>+</sup> CD163<sup>high/+</sup>).

The panels of macrophage-specific markers and IgG controls for flow cytometry analysis are listed in S1 and S2 Tables respectively.

### MESO ELISA

CAF-secreted protein expression in the cell-conditioned medium was analyzed using the MSD multi-array multiplex platform, according to the manufacturer's instructions. (Meso Scale Discovery, Rockville, MD, USA). Briefly, MSD multi-array 96 well plates were coated with a spot-specific linker and capture antibody mix, and incubated with shaking for 60 min at 750 rpm at room temperature. After capture antibody incubation, CAF-conditioned medium samples were added to the plates at 1:2 and 1:10 dilutions along with the standard calibrators provided



in the kit. The Samples and calibrator standards were incubated overnight at 4°C. Following overnight incubation, sulfo-tag-conjugated detection antibodies were added to the samples and incubated at room temperature with shaking at 750 rpm for 60 minutes. The plate was washed thrice with MSD buffer between each step. The readout was performed after the addition of MSD Gold Read Buffer. ECL was detected using an MSD Meso Sector S600 MM reader and the data were analyzed using the Discovery Workbench.

## Ethics statement

This article does not contain any studies involving human participants performed by any of the authors.

## Results

### CAFs cultured in 2D or 3D yield distinct CAF subtypes

Pancreatic ductal adenocarcinoma (PDAC) is characterized by a significant amount of desmoplasia, accounting for up to 90% of the total tumor volume [30, 31]. The microenvironment of pancreatic ductal adenocarcinoma (PDAC) is distinguished by a dense, fibrotic stroma, with cancer-associated fibroblasts (CAFs) serving as pivotal contributors [32]. Recently, researchers have classified various subtypes of CAFs in PDAC patients according to their transcriptome signatures [33, 34]. To understand how the growth of PDAC patient-derived primary CAF under 2D and 3D conditions influences the transcriptomic profiles of both CAFs and cancer cells, we used single-nucleus RNA sequencing (snRNA-seq) to detect highly sensitive and cell-specific gene expression. Simultaneously, we collected the culture supernatants and assessed the expression of a panel of immuno-oncology and inflammation markers by using a proximity extension assay (Fig 1A).

The human pancreatic cancer cell line BxPC3 and primary patient-derived pancreatic CAFs were used for TME modeling studies. Clustering analysis of snRNA-seq data confirmed that CAFs and cancer cells exhibited distinct transcriptional profiles based on the dimensionality of their growth (Fig 1B). Despite the lack of a consensus CAF molecular signature, several biomarkers have been used to distinguish different CAF subtypes in PDAC patient samples, including ACTA2, TAGLN, MYL9, TPM1, TPM2, HOPX, and POSTN for myofibroblastic CAFs (myCAFs), and CXCL8, CXCL2, PDGFRA, IL6, CFD, DPT, AGTR1, HAS1, CXCL1, CCL2, IL8, and LMNA for inflammatory CAFs (iCAFs) [35]. Interestingly, CAFs cultured in 2D, whether in monoculture or co-culture with tumor cells, exhibited elevated expression levels of myCAF-associated marker genes (Fig 1C). Conversely, CAFs cultured in 3D monoculture showed increased expression of marker genes associated with iCAFs, including CCL2, CXCL8, and PDGFRA, but had indistinguishable IL6 levels compared to CAFs cultured in 2D and 3D. Interestingly, iCAF signatures were subdued on CAFs when co-cultured with cancer cells in a 3D culture. We did not observe any antigen-presenting CAFs (apCAFs) based on the expression markers H2-Aa, H2-Ab1, CD74, CD239, or CD321 in any 2D or 3D CAF model.

The transcript levels detected by snRNA-seq and the secreted protein levels produced by CAFs under varying culture conditions showed significant compositional differences (Fig 2D). For the most part, gene transcript levels measured by snRNA-seq and protein levels measured by Olink for the same gene were strongly correlated, with a few exceptions (Fig 2B), implying that transcriptomic values reliably represented translated protein levels. Notably, 3D-cultured CAFs exhibited elevated transcript and protein expression levels of CCL7, CCL8, IL24, LIF, VEGFA, CXCL8, TNFRSF11B, and MMP10 compared to their 2D counterparts. These genes play critical roles in biological pathways related to inflammation, immune responses, tissue

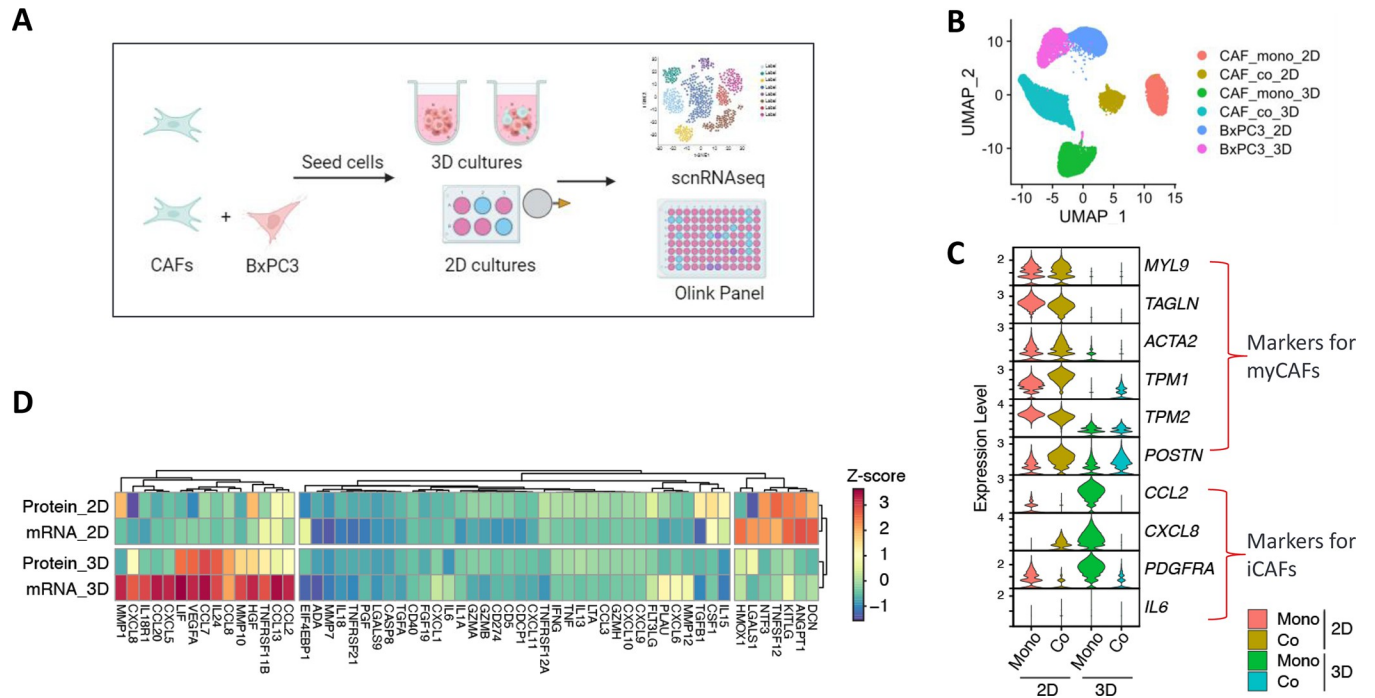

**Fig 1. Characterization of CAFs using scRNAseq and proteomic profiling.** A) Workflow for sample collection. Patient-derived primary pancreatic CAFs and pancreatic cancer cells BxPC3 were cultured in 2D and 3D. Cells were collected for scRNAseq and the culture supernatants were collected for protein measurements 72 h post seeding. B) Cell clusters identified by scRNAseq. C) Comparison of biomarker gene expression of myCAF and iCAF on CAFs in 2D and 3D monoculture and co-cultured with cancer cells. D) Heat map comparing transcriptomic levels of genes detected by scRNAseq and secreted protein expression levels detected by a proximity extension assay in the supernatants of CAF supernatants from 2D and 3D monocultures.

<https://doi.org/10.1371/journal.pone.0314227.g001>

repair, and angiogenesis and emphasize the distinct gene expression differences of CAFs cultured in 2D versus 3D.

### CAF types and cancer cells grown in 2D or 3D co-cultures reveal divergent transcriptomic profiles and matrix metalloproteinases (MMPs) signaling networks

We observed distinct transcriptomic profiles in cancer cells and CAFs when co-cultured with CAFs under 2D and 3D conditions, as revealed by the scRNAseq data analysis (Fig 2A). Notably, CAFs in 2D monoculture showed elevated expression of TGFB2, NREP, MEGF6, and POU2F2, whereas CAFs in 2D co-culture showed elevated expression of PTN, ALDH1A1, PGS10, MFAP4, RGCC, LHB, ALDH2 and LMCD1. CAFs grown in 3D monoculture showed elevated expression of CCL7, LC16A6, NR4A2, MMP3, BDKRB2, CHI3L1, TWIST1, GK, HGH, IL24, and TRPA1, whereas CAFs in 3D co-culture showed elevated expression of FAM2168, LINC01705, MMP11, and MMP9 (Figs 2B and 3C).

### CAF types in 3D co-cultures promoted tumor growth

The role of CAFs in promoting tumor progression has been extensively reported in different types of solid organ cancers [36, 37]. Because CAFs cultured in 2D or 3D displayed different transcriptomic/proteomic profiles of CAF subtypes, we next assessed how these subtypes affected cancer cell growth. The BxPC3 PDAC cell line was engineered to express both a red fluorescent protein and luciferase reporter, allowing us to monitor cancer cell growth using both high-content imaging (Incucyte) and luciferase assays (Brite-Glo) (Fig 2A). Fig 3B and 3C display images

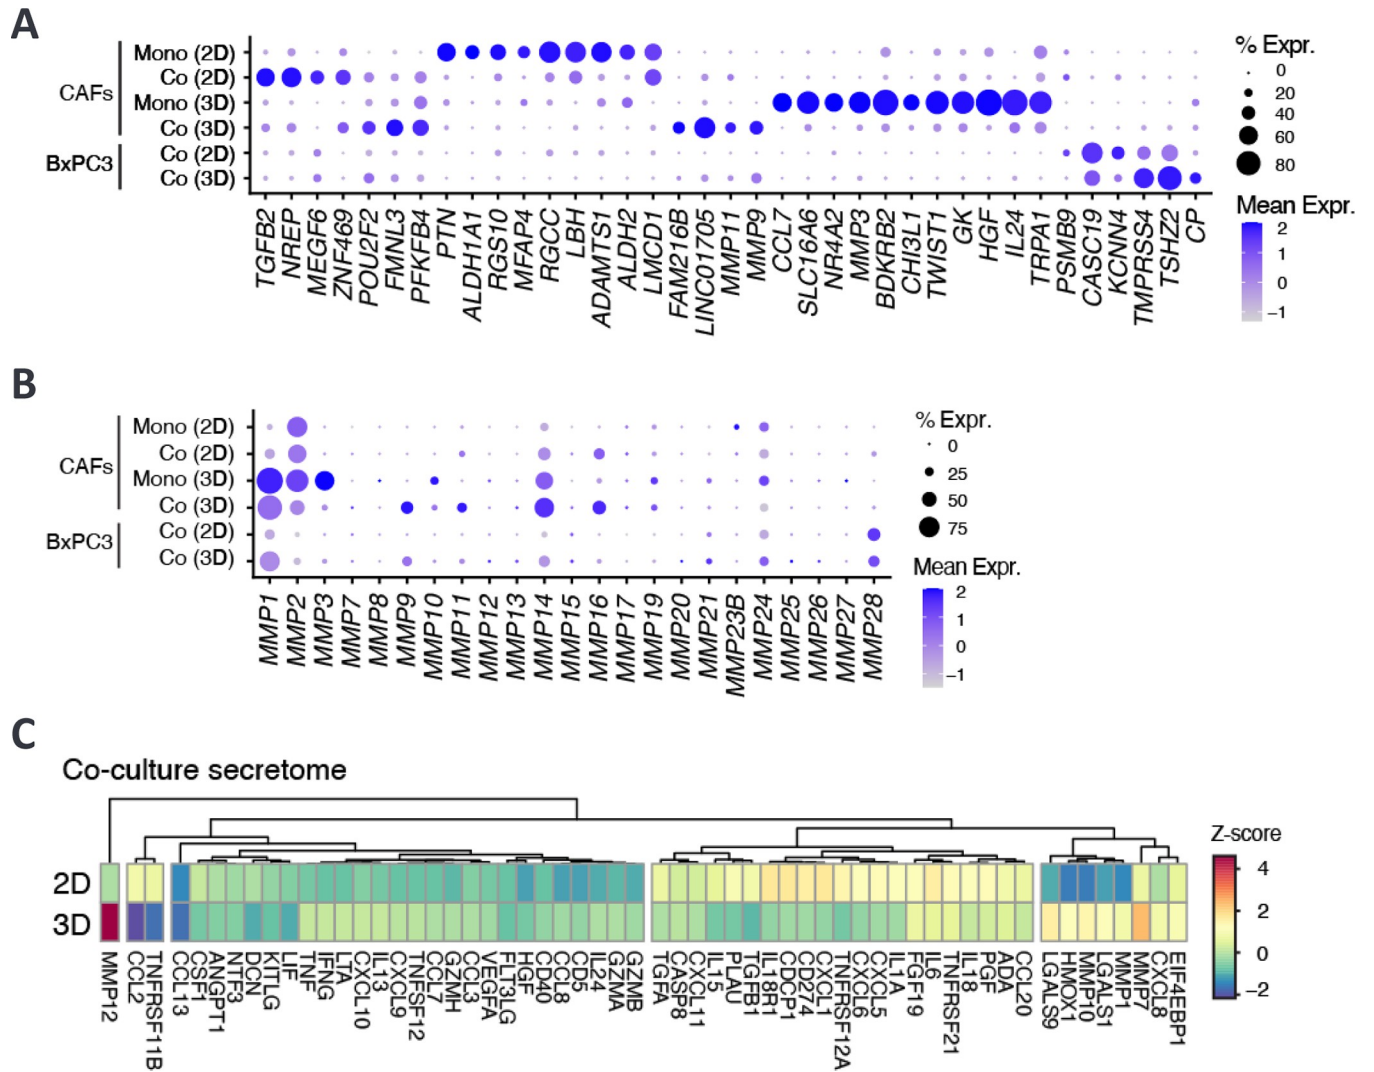

**Fig 2. Culture conditions significantly affect gene expression profiles of CAFs and cancer cells.** A) Differentiated gene expression of CAFs and cancer cells in 2D and 3D monocultures and co-cultures based on scRNAseq data. B) Transcriptomic expression levels of MMPs on CAFs and cancer cells in 2D and 3D monocultures and BxPC3 co-cultures. C) Comparison of the secreted protein expression levels in the supernatants of 2D and 3D cancer and CAF co-cultures.

<https://doi.org/10.1371/journal.pone.0314227.g002>

of red fluorescent cancer cells in both monoculture and co-culture with CAFs in 2D and 3D and reveal significant growth differences in 3D compared to 2D. We tracked the number of cancer cells in 2D cultures over time and noticed that co-culture with CAFs in a 2D environment did not significantly affect cancer cell growth, as evidenced by both the imaging analysis and endpoint luciferase assays (Fig 3D and 3E). In the 3D setting, we assessed the overall fluorescence intensity of tumor spheroids with or without CAFs and observed that co-culture with CAFs in 3D yielded a substantial increase in cancer cell growth compared to cancer cell monoculture in 3D (Fig 3F). Quantification of cancer cell growth by luciferase assay confirmed that co-culture with CAFs in 3D culture resulted in significantly greater tumor spheroid growth than 3D cancer cell monoculture (Fig 3G). These data revealed protumorigenic properties of CAFs grown in 3D co-cultures that were not observed when cultured in 2D formats.

CAFs play a pivotal role in solid tumor growth and maintenance by actively remodeling the stromal ECM through the secretion of matrix metalloproteinases (MMPs) [38, 39]. This



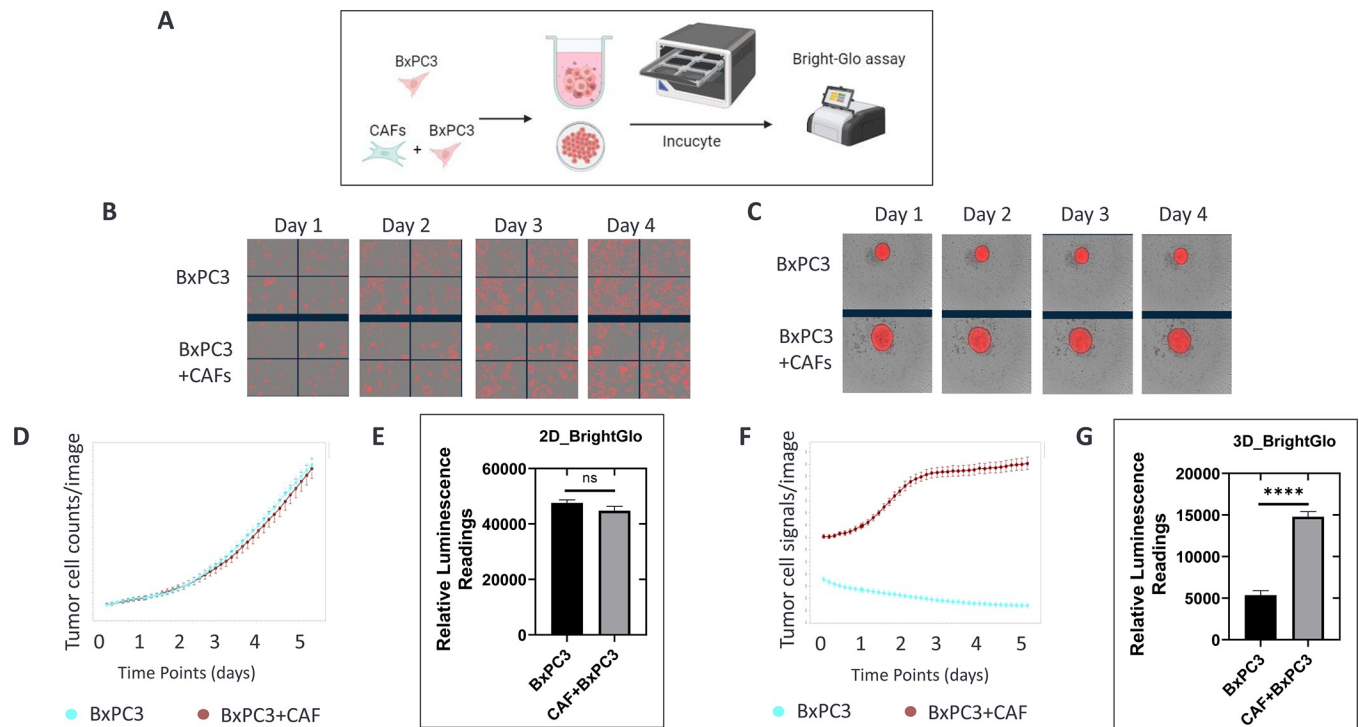

**Fig 3. CAFs in 3D co-cultures promote cancer cell growth.** A) BxPC3 pancreatic cancer cells were monocultured or co-cultured with human pancreatic CAFs in 2D and 3D. Cancer cell growth was monitored by Incucyte imaging for 5 days and end-point luciferase assay at day 5. B and C) Cancer cell images of 2D (B) and 3D (C) at days 1, 2, 3, and 4. D and F) Cancer cell growth measured by Incucyte: Cancer cell counts (D) and fluorescence intensity of spheroids (F) are plotted as y-axis. E and G) Cancer cell viability for 2D (E) and 3D (G) was measured with Bright-Glo reagents at day 5. Relative luminance units were expressed as y-axis.

<https://doi.org/10.1371/journal.pone.0314227.g003>

remodeling process provides essential structural support for tumor invasion and neoangiogenesis. We dissected the impact of culture dimensions on MMP expression by using transcriptomic and proteomic data. Notably, CAFs grown in the 3D monoculture exhibited elevated expression levels of MMP1, MMP2, MMP3, MMP10, and MMP14 compared to their 2D counterparts (Fig 3B). The transcriptomic data aligned with the equivalent protein expression levels detected in the supernatants from 3D co-cultures, which exhibited increased levels of MMP1, MMP7, MMP9, MMP10, and MMP12 compared to 2D co-cultures (Fig 3C). Interestingly, the elevated expression of MMP1, MMP2, and MMP3 observed in 3D CAF monocultures was downregulated in 3D co-cultures, indicating a tumor-mediated suppressive effect on these genes. Intriguingly, MMP9 expression was specifically upregulated in both tumor cells and CAFs only in the 3D co-cultures [40].

Proteomic analyses revealed similarly distinct expression levels of secreted proteins in the supernatants of CAFs and cancer cell co-cultures (Fig 3C). Notably, several cytokines of the CXCL family displayed higher expression levels in 2D than in 3D co-cultures. These proteins function in immune cell recruitment, tumor biology, and disease pathogenesis.

### CAF grown in 3D tumor spheroids suppressed NK cell anti-tumor function

Natural killer (NK) cells play an essential role in tumor immune surveillance, exhibiting an innate ability to kill tumor cells without prior priming [41, 42]. To understand the functional implications of divergent gene and protein expression in CAFs grown in different formats, we

explored the effect of CAFs on tumor sensitivity to activated human primary NK cells. We used the PDAC TME model, BxPC3 cells that express a red fluorescent protein and luciferase reporter, to enable both high-content kinetic imaging (Incucyte) and tumor viability (Brite-Glo) assays to monitor cancer cell growth (Fig 4A). We assessed NK cell-mediated antitumor

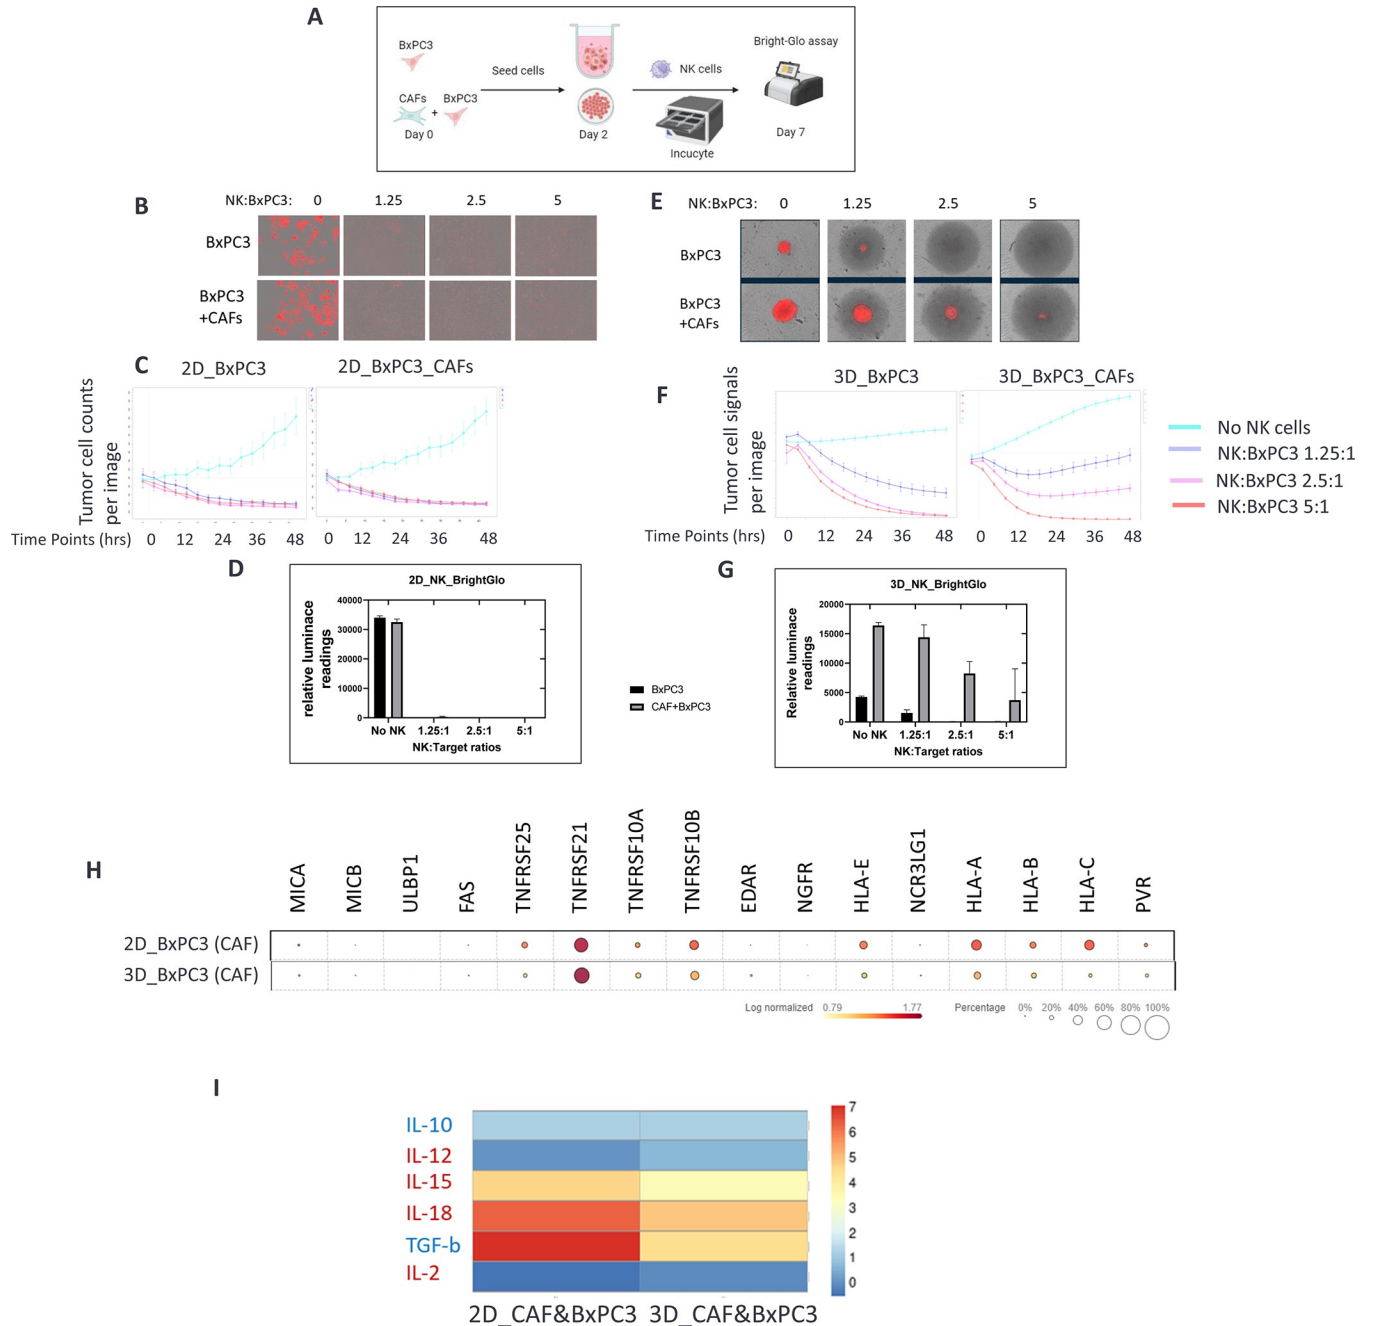

**Fig 4. CAFs in 3D co-culture protect against NK killing.** A) CAFs and cancer cells were seeded in 2D and 3D for 24 h and activated human primary NK cells were added to cell cultures. Cancer cell growth was monitored by Incucyte imaging for 5 days and end-point luciferase assay at day 5. B and C) Images of cancer cells with 1:0, 1:1.25, 1:2.5, and 1:5 ratios of target to effect cells in 2D and 3D. Cancer cell counts (D) and fluorescence intensity of spheroids (F) are plotted on y-axis. E and G) Cancer cell viability for 2D (E) and 3D (G) was measured with Brite-Glo reagents post incubation with NK cells for 5 days. Relative luminescence units are shown on y-axis. H) Transcriptomic analysis of ligands related to NK killing on cancer cells in 2D and 3D co-cultures. I) Heat map of cytokines that are related to NK killing activity in the supernatants of 2D and 3D co-cultures.

<https://doi.org/10.1371/journal.pone.0314227.g004>

function at varying effector-to-target (E:T) ratios to identify dose-responsive effects. High-content kinetic imaging studies revealed substantial NK-mediated tumor cell killing at all E:T ratios in 2D growth formats (Fig 4B). The data from both Incucyte imaging and luciferase end-point assays were consistent with 2D cell cultures (Fig 4C and 4D), and activated human primary NK cells effectively eradicated cancer cells regardless of the presence or absence of CAFs. However, these NK antitumor effects were significantly suppressed when cancer cells were grown in 3D and in the presence of CAFs (Fig 4E). We observed a modest reduction in the fluorescence intensity of cancer cells when the spheroids in the 3D co-culture were treated with activated NK cells compared to that of the 3D tumor monoculture (Fig 4F). This observation was confirmed by the end-point luciferase results (Fig 4G), which suggested that CAFs might confer protection to tumor cells from NK cell killing in 3D culture settings.

NK cell activation and effector functions rely on a delicate balance between activating and inhibitory cell surface ligand-receptor interactions independent of prior sensitization and MHC restriction [42, 43]. We investigated the expression of NK cell-interacting molecules on tumor cell surfaces co-cultured with CAFs in 2D and 3D formats. Notably, tumor cell co-culture with CAFs in 3D led to the downregulation of pro-tumor ligands (HLA-A, B, C, and E) in cancer cells compared to 2D co-culture (Fig 4H). On the other hand, expression of a pro-inflammatory molecule TNFRSF21 is considerably high in both 2D and 3D cultures. Interestingly, the expression levels of IL-15 and IL-18, which are cytokines critical for NK cell maturation, proliferation, and antitumor function, were higher in the 2D co-culture (Fig 4I). Unexpectedly, cytokines, including transforming growth factor TGF $\beta$ , IL-1 $\beta$ , and IL-10, which can impede NK cell functions, were also upregulated in the 2D co-culture compared to the 3D co-culture.

### CAFs grown in 3D induce monocyte transendothelial migration

Previous studies have highlighted the role of CAFs in modulating immune cell behavior [44, 45]. Specifically, CAFs have been implicated in the recruitment and transendothelial migration of monocytes from circulating vasculature to tumor sites through the secretion of chemokines (including CCL2) and induction of chemotactic gradients [37].

We investigated how conditioned media (CM) derived from CAFs cultured in both 2D and 3D environments affected monocyte transendothelial migration. Conditioned media that were collected from primary PDAC CAFs cultured in both 2D and 3D environments served as a source of cytokines. Human umbilical vein endothelial cells (HUVECs) were seeded onto the top chamber of a transwell and allowed to adhere overnight, forming a confluent monolayer of vascular endothelium. CD14<sup>+</sup> monocytes isolated from healthy human donor leukopaks were stained with CellTracker Green CMFDA dye and subsequently added to the top chamber (Fig 5A). Monocyte migration was monitored using kinetic high-content imaging. The captured images illustrate the increased migration of monocytes from the top (blood vessel) to the bottom (tumor compartment) of the Transwell membrane during incubation (Fig 5B). Quantitation of imaging data showed that conditioned media from 3D CAFs considerably enhanced monocyte transendothelial migration compared to control media (Fig 5C). Conditioned media from 2D CAFs promoted only modest monocyte migration, not significantly more than control media (Fig 5C). These data revealed a secreted chemotactic component from 3D CAFs that contributes to monocyte recruitment and tumor infiltration, which is not secreted by 2D CAFs.

To better understand the secreted factors responsible for monocyte transendothelial migration, we examined the expression levels of key cytokines related to monocyte migration in 2D and 3D CAF cultures. While the transcript levels of CCL2 and MMP2, known enhancers of

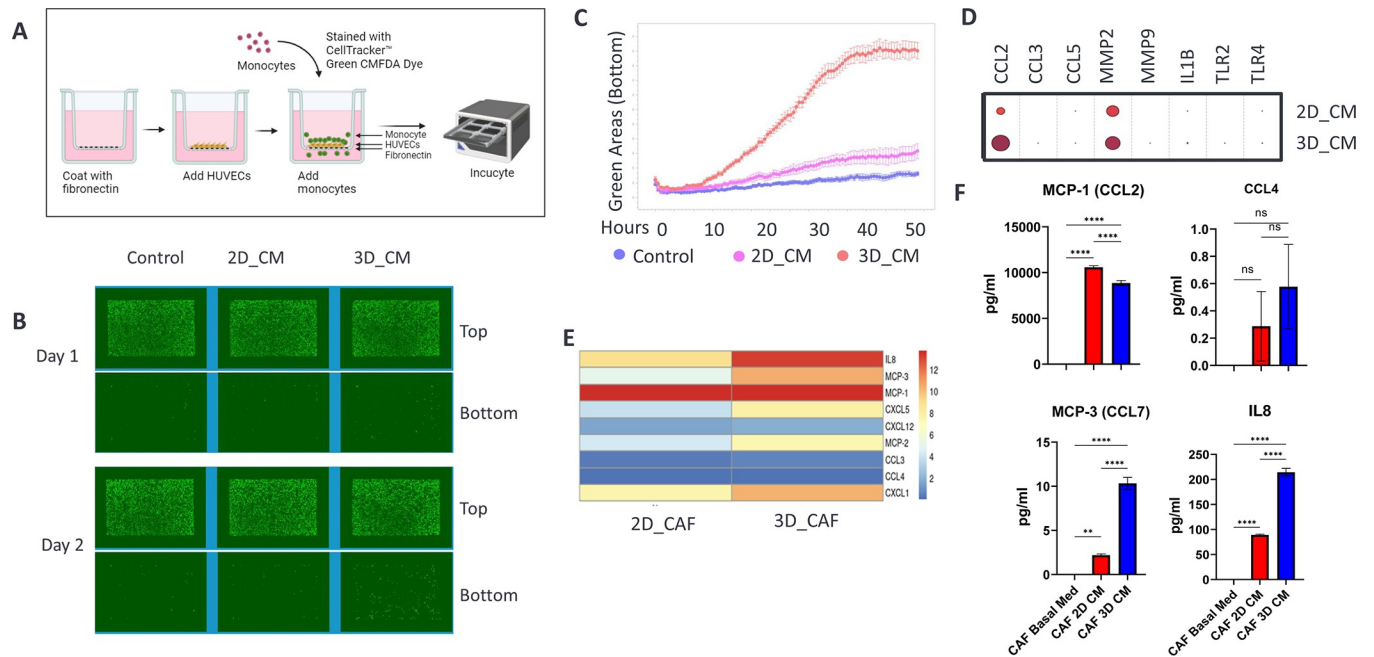

**Fig 5. Conditioned media from 3D CAF culture induced monocyte transendothelial migration.** A) human vascular endothelial cells (HUVECs) were added onto the top chamber of a transwell and incubated overnight to form a confluent monolayer. Then CellTracker green dye pre-stained monocytes were added to the top chamber. Conditioned media from 2D and 3D CAF cultures were used as the chemoattractant and basal culture media as the background control. Monocyte migration was monitored using imaging of the top and bottom membranes by Incucyte. B) Images of top and bottom membranes of transwells taken on day 1 and day 2. C) Kinetic, quantitative data of monocyte migration detected by imaging analysis. D) Transcriptomic gene expression levels of monocyte migration factors from scRNAseq. E) Relative expression levels of secreted monocyte migration inducing proteins detected in the 2D and 3D CAF conditioned media. F) Quantitation of chemoattractant expression levels in 2D and 2D CAF conditioned media by ELISA.

<https://doi.org/10.1371/journal.pone.0314227.g005>

monocyte migration, were significantly higher in 3D cultured CAFs compared than in 2D cultures (Fig 5D), the protein expression levels of CCL2 (MCP-1) remained comparable in the supernatants from both 2D and 3D CAF monocultures (Fig 5E). However, our results revealed that several other cytokines associated with monocyte migration, such as IL-8, MCP2, MCP-3, CXCL-1, and CXCL-5, were significantly elevated in 3D CAF-conditioned media compared to their 2D counterparts (Fig 5E). Additionally, we performed an enzyme-linked immunosorbent assay (ELISA) to measure the expression of several selected cytokines including IL8, CCL4, CCL2, and CCL7, in the supernatants of 2D and 3D CAFs cultures. We confirmed that the expression levels of CCL2 in 2D and 3D conditioned media were comparable, and validated the increased expression levels of IL-8, CCL4, and CCL7 in 3D CAFs compared with those in 2D CAFs (Fig 5F). These data revealed a clinically relevant chemotactic mechanism [46] that induces monocyte transendothelial migration into tumors, which can only be reproduced using 3D CAF models.

### CAFs grown in 3D induce macrophage differentiation into the protumorigenic M2 subtype

Tumor-associated macrophages (TAMs) are strategically positioned near CAF-populated regions within the tumor stroma, where they exert protumorigenic functions [47]. These immune cells are crudely classified into two distinct subsets, M1 and M2 (where M1 is anti-tumorigenic and M2 is protumorigenic), each is activated by specific polarizing cytokines and plays distinct roles in cancer progression [48–50]. Given the propensity of 3D CAFs to induce

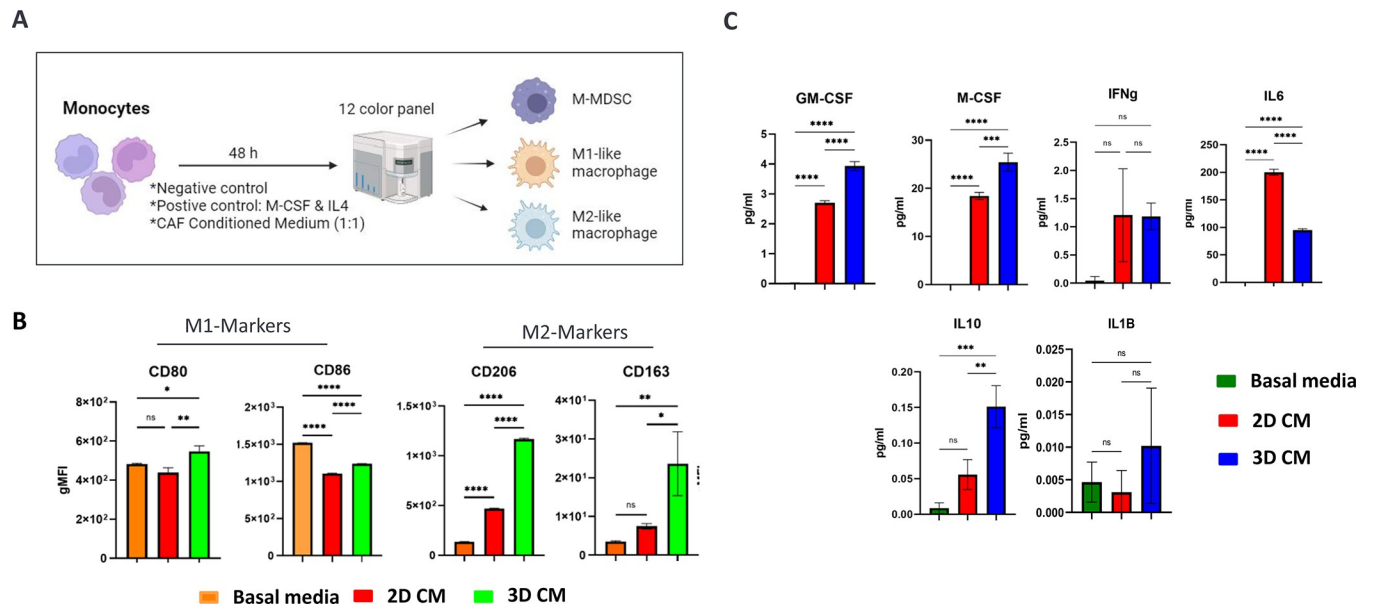

**Fig 6. Conditioned media from 3D CAF cultures induced M2-like macrophage polarization.** A) Monocytes were incubated with base culture media or conditioned media from 2D and 3D CAF cultures for 48 hrs. Biomarkers for macrophages were detected by multi-color FACS analysis. B) Expression levels of biomarkers for M1 and M2 macrophages induced by 2D and 3D conditioned media. C) Monocyte differentiation-inducing cytokines in 2D and 2D CAF conditioned media detected by ELISA.

<https://doi.org/10.1371/journal.pone.0314227.g006>

monocyte transendothelial migration, we next investigated how they would affect subsequent monocyte differentiation and macrophage polarization once infiltrated into the TME.

We cultured monocytes in conditioned media derived from both 2D and 3D CAF cultures for 48 h and then used multicolor flow cytometry analysis to phenotype polarized macrophages based on distinct cell surface marker expression (Fig 6A). Monocytes grown in the presence of 3D CAF-conditioned media demonstrated elevated cell surface expression levels of CD206 and CD163, which are canonical protumoral markers of M2 TAMs, compared with those grown in basal media and 2D CAF-conditioned media (Fig 6B).

CAF-secreted cytokines play critical roles in monocyte recruitment and transformation into M2 macrophages [51, 52]. Specifically, GM-CSF, M-CSF, IL-4, IL-13, IL-8, IL-10, TGF- $\beta$ , IL-1b, and CCL2 have been shown to promote M2 polarization [45]. Conversely, TNF- $\alpha$ , IFN- $\gamma$ , TGF- $\beta$ , VEGF, IL-6, and CXCL12 skew macrophage differentiation toward the M1 phenotype [53]. We quantified the expression levels of several key cytokines in the conditioned media of the 2D and 3D CAF cultures using ELISA. Notably, the levels of M2-inducing cytokines, such as IL-10, IL-1b, GM-CSF, and M-CSF, were significantly higher in 3D CAF-conditioned media than in 2D media (Fig 6C). Conversely, IL-6, an M1 inducing cytokine, was elevated in 2D CAF-conditioned media compared to 3D conditioned media (Fig 6C). Collectively, these observations indicate that CAFs grown in a 3D tumor spheroid format create chemotactic gradients that facilitate monocyte migration from the tumor vasculature and the subsequent polarization into protumorigenic M2 macrophages.

## Discussion

Over 90% of anti-cancer drug candidates have translational failures in clinical trials [54]. A leading cause of this failure can be attributed to poorly-predictive preclinical tumor models that are currently standardized in drug discovery and development [55]. Important tumor stromal components, often overlooked in preclinical models, must be addressed to ensure that



assessment of drug efficacies and their mechanisms of action have clinical translatability [56]. 3D tumor spheroid cultures have proven to be robust surrogates for clinical tumor pathologies, and are recognized for their ability to capture oncological disease states better than conventional 2D tumor formats [57, 58].

CAFs have received increasing attention over the past decade because of their critical roles in tumor initiation and progression in the TME. CAFs play pivotal roles in localized tumor immunosuppression through the transmission of immune-modulating cytokines and soluble factors within the TME [59]. Indeed, CAF-targeting therapies have proven to be synergistic complements to immune checkpoint inhibitors and have provided considerable clinical benefits for patients with CAF-rich tumors [12, 60]. Consequently, the number of preclinical studies aimed at restoring the anti-cancer immune response through CAF-modulating therapies has increased dramatically in recent years [61–63]. Numerous studies have highlighted the importance of the 3D stromal microenvironment in the development of multicellular in vitro cancer models [64, 65]. In this study, using highly sensitive single-nucleus transcriptomic profiling and secretome analyses, we demonstrated that in vitro culture of patient-derived human primary CAFs in 2D and 3D cultures results in different pathological subtypes of CAFs. The identification of the unique transcriptional signatures of myCAFs and iCAFs in 2D and 3D cultures, respectively, suggests that CAF activation is highly sensitive and heavily dependent on dimensional growth and its association with neoplastic cells. While the myCAF subtype is involved in tumor scaffolding and localizes to periglandular tumor regions, iCAFs are associated with more distal TME components, such as vasculature and tertiary lymphoid structures [9, 58], and thus represent a more relevant pathological state for interrogating CAF-immune cell interactions. Interestingly, while CAFs in 3D monocultures display iCAF signatures, CAFs in 3D co-cultures with cancer cells specifically lose their iCAF features [66]. Our data complement previous reports that CAFs are dynamic and can assume different phenotypes based on their spatial and biochemical niches within the PDAC microenvironment [9].

Non-cancerous stromal cells within the tumor microenvironment play pivotal roles in remodeling the ECM, which is a functionally active component of tumors that plays crucial roles in mechanical support, modulation of the microenvironment, and immune cell signaling [67]. Tumor and stromal cells commonly express increased levels of MMPs to remodel the TME for a variety of downstream pathological processes [68–70]. Here, we observed that CAFs grown in 3D cultures upregulated a variety of MMPs such as MMP-1, MMP2, MMP3, and MMP9, which are major players in tumor angiogenesis, tissue remodeling, repair, and maintenance [69, 71, 72]. CAF-derived MMP2 has been strongly implicated in CAF infiltration [72] and is a prerequisite for neoangiogenesis [71]. Interestingly, MMP9, a protease crucial for tumor cell invasion into neighboring tissues and distal metastasis [40], is expressed in both CAFs and cancer cells but only in 3D co-cultures, highlighting the importance of CAF/cancer cell crosstalk for MMP9 secretion. Our results suggest that CAFs cultured in 3D co-cultured tumor spheroids recapitulate cell adhesion and ECM-modifying enzyme secretion, which is consistent with the ECM-mediated cancer-CAF crosstalk found in patient tumors.

We assessed and compared the effects of CAFs on cancer cell growth under 2D and 3D culture conditions, and demonstrated that CAFs in 3D tumor spheroid co-culture with cancer cells promoted tumor cell growth, which is consistent with previous reports [73, 74]. CAFs secrete several growth factors responsible for their pro-proliferative effects on cancer cells. In this study, we observed altered expression of key protumorigenic cytokines and chemokines in 3D cultures compared to 2D cultures, based on secretome profiling.

CAFs play an important role in regulating the antitumor activity of tumor-infiltrating immune cells, including innate and adaptive immune cells in the TME [75]. NK cells are critical regulators of tumor immunosurveillance and lysis of malignant cells, and the manipulation

of NK cell function has been the focus of immunotherapy protocols in cases of resistance to chemotherapy or immune checkpoint inhibitor drugs [76, 77]. Here, we demonstrated that NK cells efficiently killed cancer cells in 2D cancer cell monoculture cultures and co-cultures with CAFs but demonstrated depleted anti-tumor function in a more physiological 3D tumor spheroid model. Several studies have indicated that CAFs exert inhibitory effects on NK cells through multiple processes, including NK receptor activation and cytokine production, either directly or indirectly [37, 78, 79]. CAFs can also indirectly restrict the activity and function of NK cells by modulating the expression of their activating receptor ligands in tumor cells [80]. However, in our study, NK cell death was not associated with the expression of NK inhibitory signals (MHC-I and MHC-II), as tumor cells from 2D co-cultures demonstrated enhanced MHC expression. Similarly, several studies have shown that CAF-secreted TGF- $\beta$  significantly inhibited the activation and cytotoxic activity of NK cells [81], though in our 2D cultures TGF- $\beta$  was significantly elevated. The reduced sensitivity of cancer cells to NK cell killing in 3D cultures may be due to the physical barriers of the 3D spheroid architecture, although more granular studies are required to understand these potential mechanisms.

Tumor-associated macrophages (TAMs) are the most prominent immune cells in the vicinity of CAF-populated areas, suggesting important functional interactions between these two cell types [47]. Indeed, the interaction between CAFs and TAMs is scored the strongest within the network of interactions between cell types in human breast cancer TMEs [59]. Our data demonstrated that conditioned media from 3D CAFs facilitated CD14<sup>+</sup> monocyte migration and enhanced the polarization of macrophages to the M2 protumorigenic phenotype, consistent with previous reports on CAF/macrophage clinical interactions [48]. Mace et al. documented the central role of CAF-derived macrophage colony-stimulating factor 1 (M-CSF1), IL-6, and CCL2 in monocyte recruitment and increased M2/M1 macrophage ratio in pancreatic cancer [82]. Our 3D models reproduced these findings, suggesting that the factors secreted from CAFs grown as tumor spheroids mimic the clinical mechanisms of monocyte extravasation into the TME and their differentiation into protumorigenic TAM subtypes.

In summary, we compared different *ex vivo* experimental strategies to mimic clinical CAF biology within a complex human tumor microenvironment. Although both inflammatory and myofibroblastic CAF subtypes can be generated using either 2D or 3D culture formats, 3D tumor spheroid growth in the presence of neoplastic PDAC cells yields the most immuno-relevant CAF. Collectively, our data from the transcriptomic and proteomic profiles of tumor spheroid PDAC CAFs suggest that 3D models yield more immunosuppressive TMEs, manifested through both NK cell and monocyte/macrophage antitumor suppression. As these phenotypes more closely resemble clinical tumors with respect to immune cell presence and function, we propose the integration of 3D TME spheroids into standardized preclinical immuno-oncology pipelines to improve candidate triage and prediction of human therapeutic efficacy.

## Supporting information

### **S1 Fig. Quality control (QC) for single-nucleus RNA sequencing (snRNAseq) data analysis.**

(A) Violin plots displaying the QC metrics of the snRNA-seq libraries used in this study after quality control filtering. The distribution of mRNA molecular counts, gene counts, and the percentage of mitochondrial mRNAs within individual libraries are illustrated in the left, middle, and right panels, respectively. (B) Two-dimensional UMAP visualization displays the clustering of 16,235 single-nuclei transcriptomes produced in this study, colored according to the cell culture conditions. Abbreviations: Mono, monoculture of cancer-associated fibroblasts (CAFs); Co, co-culture of CAFs with BxPC3 pancreatic cancer cells; 2D, two-dimensional

monolayer culture; 3D, three-dimensional spheroid cell culture.  
(PPTX)

**S1 Table. The panel of macrophage-specific markers for flow cytometry analysis.**  
(DOCX)

**S2 Table. IgG controls for flow cytometry analysis.**  
(DOCX)

## Acknowledgments

This study was supported by Takeda Development Center of the Americas. We thank Xiangjun Tian, Shreya Shirodkar, and Charlotte Darby at Takeda Development Center Americas, Inc. for data analysis and members of Core Biology at Takeda Development Center Americas, Inc. for their meaningful discussions and technical support. Figs [1A](#), [3A](#), [4A](#), [5A](#) and [6A](#) were created using the BioRender software.

## Author Contributions

**Conceptualization:** Jian-Ping Yang, Tsubasa Shiraishi, Nicole Aiello, Michael Shaw, Toshihiro Nakamura, Akiko Abiru, Narender R. Gavva, Shane R. Horman.

**Data curation:** Masashi Yamaji, Thang Pham, Han Do.

**Formal analysis:** Masashi Yamaji, Thang Pham, Han Do.

**Funding acquisition:** Narender R. Gavva.

**Investigation:** Jian-Ping Yang, Nikhil Nitin Kulkarni.

**Methodology:** Jian-Ping Yang, Nikhil Nitin Kulkarni.

**Project administration:** Jian-Ping Yang, Shane R. Horman.

**Supervision:** Jian-Ping Yang, Shane R. Horman.

**Validation:** Jian-Ping Yang, Nikhil Nitin Kulkarni.

**Visualization:** Jian-Ping Yang.

**Writing – original draft:** Jian-Ping Yang, Shane R. Horman.

**Writing – review & editing:** Jian-Ping Yang, Tsubasa Shiraishi, Shane R. Horman.

## References

1. Bizzarri M, Cucina A. Tumor and the microenvironment: a chance to reframe the paradigm of carcinogenesis? *BioMed research international*. 2014;2014. <https://doi.org/10.1155/2014/934038> PMID: [25013812](#)
2. Klemm F, Joyce JA. Microenvironmental regulation of therapeutic response in cancer. *Trends in cell biology*. 2015; 25(4):198–213. <https://doi.org/10.1016/j.tcb.2014.11.006> PMID: [25540894](#)
3. Junttila MR, De Sauvage FJ. Influence of tumour micro-environment heterogeneity on therapeutic response. *Nature*. 2013; 501(7467):346–54. <https://doi.org/10.1038/nature12626> PMID: [24048067](#)
4. Nallasamy P, Nimmakayala RK, Parte S, Are AC, Batra SK, Ponnusamy MP. Tumor microenvironment enriches the stemness features: the architectural event of therapy resistance and metastasis. *Molecular cancer*. 2022; 21(1):225. <https://doi.org/10.1186/s12943-022-01682-x> PMID: [36550571](#)
5. Baghban R, Roshangar L, Jahanban-Esfahlan R, Seidi K, Ebrahimi-Kalan A, Jaymand M, et al. Tumor microenvironment complexity and therapeutic implications at a glance. *Cell Communication and Signaling*. 2020; 18:1–19.

6. Sahai E, Astsaturov I, Cukierman E, DeNardo DG, Egeblad M, Evans RM, et al. A framework for advancing our understanding of cancer-associated fibroblasts. *Nature Reviews Cancer*. 2020; 20(3):174–86. <https://doi.org/10.1038/s41568-019-0238-1> PMID: 31980749
7. Gascard P, Tlsty TD. Carcinoma-associated fibroblasts: orchestrating the composition of malignancy. *Genes & development*. 2016; 30(9):1002–19. <https://doi.org/10.1101/gad.279737.116> PMID: 27151975
8. Lavie D, Ben-Shmuel A, Erez N, Scherz-Shouval R. Cancer-associated fibroblasts in the single-cell era. *Nature cancer*. 2022; 3(7):793–807. <https://doi.org/10.1038/s43018-022-00411-z> PMID: 35883004
9. Öhlund D, Handly-Santana A, Biffi G, Elyada E, Almeida AS, Ponz-Sarvise M, et al. Distinct populations of inflammatory fibroblasts and myofibroblasts in pancreatic cancer. *Journal of Experimental Medicine*. 2017; 214(3):579–96. <https://doi.org/10.1084/jem.20162024> PMID: 28232471
10. Sarkar M, Nguyen T, Gundre E, Ogunlusi O, El-Sobky M, Giri B, et al. Cancer-associated fibroblasts: The chief architect in the tumor microenvironment. *Frontiers in Cell and Developmental Biology*. 2023; 11:1089068. <https://doi.org/10.3389/fcell.2023.1089068> PMID: 36793444
11. Zhang W, Wang J, Liu C, Li Y, Sun C, Wu J, et al. Crosstalk and plasticity driving between cancer-associated fibroblasts and tumor microenvironment: significance of breast cancer metastasis. *Journal of Translational Medicine*. 2023; 21(1):827. <https://doi.org/10.1186/s12967-023-04714-2> PMID: 37978384
12. Pei L, Liu Y, Liu L, Gao S, Gao X, Feng Y, et al. Roles of cancer-associated fibroblasts (CAFs) in anti-PD-1/PD-L1 immunotherapy for solid cancers. *Molecular Cancer*. 2023; 22(1):29. <https://doi.org/10.1186/s12943-023-01731-z> PMID: 36759842
13. Amornsapak K, Insawang T, Thuwajit P, O-Charoenrat P, Eccles SA, Thuwajit C. Cancer-associated fibroblasts induce high mobility group box 1 and contribute to resistance to doxorubicin in breast cancer cells. *BMC cancer*. 2014; 14:1–12.
14. Attieh Y, Vignjevic DM. The hallmarks of CAFs in cancer invasion. *European journal of cell biology*. 2016; 95(11):493–502. <https://doi.org/10.1016/j.ejcb.2016.07.004> PMID: 27575401
15. Koustoulidou S, Hoorens MW, Dalm SU, Mahajan S, Debets R, Seimbille Y, et al. Cancer-associated fibroblasts as players in cancer development and progression and their role in targeted radionuclide imaging and therapy. *Cancers*. 2021; 13(5):1100. <https://doi.org/10.3390/cancers13051100> PMID: 33806468
16. Zhang H, Yue X, Chen Z, Liu C, Wu W, Zhang N, et al. Define cancer-associated fibroblasts (CAFs) in the tumor microenvironment: new opportunities in cancer immunotherapy and advances in clinical trials. *Mol Cancer*. 2023; 22(1):159. <https://doi.org/10.1186/s12943-023-01860-5> PMID: 37784082
17. Sung KE, Su X, Berthier E, Pehlke C, Friedl A, Beebe DJ. Understanding the impact of 2D and 3D fibroblast cultures on in vitro breast cancer models. *PLoS One*. 2013; 8(10):e76373. <https://doi.org/10.1371/journal.pone.0076373> PMID: 24124550
18. Woodley JP, Lambert DW, Asencio IO. Understanding Fibroblast Behavior in 3D Biomaterials. *Tissue Eng Part B Rev*. 2022; 28(3):569–78. <https://doi.org/10.1089/ten.TEB.2021.0010> PMID: 34102862
19. Louault K, Li RR, DeClerck YA. Cancer-Associated Fibroblasts: Understanding Their Heterogeneity. *Cancers (Basel)*. 2020; 12(11). <https://doi.org/10.3390/cancers121113108> PMID: 33114328
20. Melchionna R, Trono P, Di Carlo A, Di Modugno F, Nistico P. Transcription factors in fibroblast plasticity and CAF heterogeneity. *J Exp Clin Cancer Res*. 2023; 42(1):347. <https://doi.org/10.1186/s13046-023-02934-4> PMID: 38124183
21. Joseph JS, Malindisa ST, Ntwasa M. Two-dimensional (2D) and three-dimensional (3D) cell culturing in drug discovery. *Cell Culture*. 2018; 2:1–22.
22. Badr-Eldin SM, Aldawsari HM, Kotta S, Deb PK, Venugopala KN. Three-dimensional in vitro cell culture models for efficient drug discovery: Progress so far and future prospects. *Pharmaceuticals*. 2022; 15(8):926. <https://doi.org/10.3390/ph15080926> PMID: 36015074
23. Sharma G, Goyal Y, Bhatia S. Preclinical Animal Models of Cancer: Applications and Limitations. *Handbook of Animal Models and its Uses in Cancer Research*: Springer; 2022. p. 1–21.
24. Rodrigues DB, Reis RL, Pirraco RP. Modelling the complex nature of the tumor microenvironment: 3D tumor spheroids as an evolving tool. *Journal of Biomedical Science*. 2024; 31(1):13. <https://doi.org/10.1186/s12929-024-00997-9> PMID: 38254117
25. Anderson SR, Stagner EJ, Sivakumar H, Skardal A. Three-dimensional bioprinting of in vitro tumor organoid and organ-on-a-chip models. *MRS Bulletin*. 2023; 48(6):643–56.
26. Costa EC, Moreira AF, de Melo-Diogo D, Gaspar VM, Carvalho MP, Correia IJ. 3D tumor spheroids: an overview on the tools and techniques used for their analysis. *Biotechnology advances*. 2016; 34(8):1427–41. <https://doi.org/10.1016/j.biotechadv.2016.11.002> PMID: 27845258

27. Wadman M. FDA no longer has to require animal testing for new drugs. *Science*. 2023; 379(6628):127–8. <https://doi.org/10.1126/science.adg6276> PMID: 36634170
28. Qu S, Xu R, Yi G, Li Z, Zhang H, Qi S, et al. Patient-derived organoids in human cancer: a platform for fundamental research and precision medicine. *Molecular Biomedicine*. 2024; 5(1):6. <https://doi.org/10.1186/s43556-023-00165-9> PMID: 38342791
29. Ingber DE. Human organs-on-chips for disease modelling, drug development and personalized medicine. *Nature Reviews Genetics*. 2022; 23(8):467–91. <https://doi.org/10.1038/s41576-022-00466-9> PMID: 35338360
30. Whatcott CJ, Diep CH, Jiang P, Watanabe A, LoBello J, Sima C, et al. Desmoplasia in primary tumors and metastatic lesions of pancreatic cancer. *Clinical cancer research*. 2015; 21(15):3561–8. <https://doi.org/10.1158/1078-0432.CCR-14-1051> PMID: 25695692
31. Cannon A, Thompson C, Hall BR, Jain M, Kumar S, Batra SK. Desmoplasia in pancreatic ductal adenocarcinoma: insight into pathological function and therapeutic potential. *Genes & cancer*. 2018; 9(3–4):78. <https://doi.org/10.18632/genesandcancer.171> PMID: 30108679
32. Bryce AS, Dreyer SB, Froeling FEM, Chang DK. Exploring the Biology of Cancer-Associated Fibroblasts in Pancreatic Cancer. *Cancers (Basel)*. 2022; 14(21). <https://doi.org/10.3390/cancers14215302> PMID: 36358721
33. Wang Y, Liang Y, Xu H, Zhang X, Mao T, Cui J, et al. Single-cell analysis of pancreatic ductal adenocarcinoma identifies a novel fibroblast subtype associated with poor prognosis but better immunotherapy response. *Cell discovery*. 2021; 7(1):36. <https://doi.org/10.1038/s41421-021-00271-4> PMID: 34035226
34. Menezes S, Okail MH, Jalil SMA, Kocher HM, Cameron AJ. Cancer-associated fibroblasts in pancreatic cancer: new subtypes, new markers, new targets. *The Journal of Pathology*. 2022; 257(4):526–44. <https://doi.org/10.1002/path.5926> PMID: 35533046
35. Elyada E, Bolisetty M, Laise P, Flynn WF, Courtois ET, Burkhart RA, et al. Cross-species single-cell analysis of pancreatic ductal adenocarcinoma reveals antigen-presenting cancer-associated fibroblasts. *Cancer discovery*. 2019; 9(8):1102–23. <https://doi.org/10.1158/2159-8290.CD-19-0094> PMID: 31197017
36. Joshi RS, Kanugula SS, Sudhir S, Pereira MP, Jain S, Aghi MK. The role of cancer-associated fibroblasts in tumor progression. *Cancers*. 2021; 13(6):1399. <https://doi.org/10.3390/cancers13061399> PMID: 33808627
37. Mao X, Xu J, Wang W, Liang C, Hua J, Liu J, et al. Crosstalk between cancer-associated fibroblasts and immune cells in the tumor microenvironment: new findings and future perspectives. *Molecular cancer*. 2021; 20:1–30.
38. Asif PJ, Longobardi C, Hahne M, Medema JP. The role of cancer-associated fibroblasts in cancer invasion and metastasis. *Cancers*. 2021; 13(18):4720. <https://doi.org/10.3390/cancers13184720> PMID: 34572947
39. Wright K, Ly T, Kriet M, Czirok A, Thomas SM. Cancer-associated fibroblasts: master tumor microenvironment modifiers. *Cancers*. 2023; 15(6):1899. <https://doi.org/10.3390/cancers15061899> PMID: 36980785
40. Huang H. Matrix metalloproteinase-9 (MMP-9) as a cancer biomarker and MMP-9 biosensors: recent advances. *Sensors*. 2018; 18(10):3249. <https://doi.org/10.3390/s18103249> PMID: 30262739
41. Meza Guzman LG, Keating N, Nicholson SE. Natural killer cells: tumor surveillance and signaling. *Cancers*. 2020; 12(4):952. <https://doi.org/10.3390/cancers12040952> PMID: 32290478
42. Sharma P, Kumar P, Sharma R. Natural killer cells-their role in tumour immunosurveillance. *Journal of clinical and diagnostic research: JCDR*. 2017; 11(8):BE01. <https://doi.org/10.7860/JCDR/2017/26748.10469> PMID: 28969116
43. Terrén I, Orrantia A, Vitallé J, Zenarruzabeitia O, Borrego F. NK cell metabolism and tumor microenvironment. *Frontiers in Immunology*. 2019; 10:483200. <https://doi.org/10.3389/fimmu.2019.02278> PMID: 31616440
44. Tsoumakidou M. The advent of immune stimulating CAFs in cancer. *Nature Reviews Cancer*. 2023; 23(4):258–69. <https://doi.org/10.1038/s41568-023-00549-7> PMID: 36807417
45. Arpinati L, Scherz-Shouval R. From gatekeepers to providers: regulation of immune functions by cancer-associated fibroblasts. *Trends in Cancer*. 2023; 9(5):421–43. <https://doi.org/10.1016/j.trecan.2023.01.007> PMID: 36870916
46. Tsou CL, Peters W, Si Y, Slaymaker S, Aslanian AM, Weisberg SP, et al. Critical roles for CCR2 and MCP-3 in monocyte mobilization from bone marrow and recruitment to inflammatory sites. *J Clin Invest*. 2007; 117(4):902–9. <https://doi.org/10.1172/JCI29919> PMID: 17364026



47. Lin Y, Xu J, Lan H. Tumor-associated macrophages in tumor metastasis: biological roles and clinical therapeutic applications. *Journal of hematology & oncology*. 2019; 12(1):76. <https://doi.org/10.1186/s13045-019-0760-3> PMID: 31300030
48. Italiani P, Boraschi D. From monocytes to M1/M2 macrophages: phenotypical vs. functional differentiation. *Frontiers in immunology*. 2014; 5:116283. <https://doi.org/10.3389/fimmu.2014.00514> PMID: 25368618
49. Anand N, Peh KH, Kolesar JM. Macrophage Repolarization as a Therapeutic Strategy for Osteosarcoma. *Int J Mol Sci*. 2023; 24(3). <https://doi.org/10.3390/ijms24032858> PMID: 36769180
50. Zhou BW, Liu HM, Xu F, Jia XH. The role of macrophage polarization and cellular crosstalk in the pulmonary fibrotic microenvironment: a review. *Cell Commun Signal*. 2024; 22(1):172. <https://doi.org/10.1186/s12964-024-01557-2> PMID: 38461312
51. Gok Yavuz B, Gunaydin G, Gedik ME, Kosemehmetoglu K, Karakoc D, Ozgur F, et al. Cancer associated fibroblasts sculpt tumour microenvironment by recruiting monocytes and inducing immunosuppressive PD-1+ TAMs. *Scientific reports*. 2019; 9(1):3172. <https://doi.org/10.1038/s41598-019-39553-z> PMID: 30816272
52. Xiong J, Xiao R, Zhao J, Zhao Q, Luo M, Li F, et al. Matrix stiffness affects tumor-associated macrophage functional polarization and its potential in tumor therapy. *Journal of Translational Medicine*. 2024; 22(1):85. <https://doi.org/10.1186/s12967-023-04810-3> PMID: 38246995
53. Hou S, Zhao Y, Chen J, Lin Y, Qi X. Tumor-associated macrophages in colorectal cancer metastasis: molecular insights and translational perspectives. *Journal of Translational Medicine*. 2024; 22(1):62. <https://doi.org/10.1186/s12967-024-04856-x> PMID: 38229160
54. Wong CH, Siah KW, Lo AW. Estimation of clinical trial success rates and related parameters. *Biostatistics*. 2019; 20(2):273–86. <https://doi.org/10.1093/biostatistics/kxx069> PMID: 29394327
55. Law AM, Rodriguez de la Fuente L, Grundy TJ, Fang G, Valdes-Mora F, Gallego-Ortega D. Advancements in 3D cell culture systems for personalizing anti-cancer therapies. *Frontiers in Oncology*. 2021; 11:782766. <https://doi.org/10.3389/fonc.2021.782766> PMID: 34917509
56. Honkala A, Malhotra SV, Kummar S, Junttila MR. Harnessing the predictive power of preclinical models for oncology drug development. *Nature Reviews Drug Discovery*. 2022; 21(2):99–114. <https://doi.org/10.1038/s41573-021-00301-6> PMID: 34702990
57. Lee JM, Mhawech-Fauceglia P, Lee N, Parsanian LC, Lin YG, Gayther SA, et al. A three-dimensional microenvironment alters protein expression and chemosensitivity of epithelial ovarian cancer cells in vitro. *Laboratory investigation*. 2013; 93(5):528–42. <https://doi.org/10.1038/labinvest.2013.41> PMID: 23459371
58. Luca AC, Mersch S, Deenen R, Schmidt S, Messner I, Schäfer K-L, et al. Impact of the 3D microenvironment on phenotype, gene expression, and EGFR inhibition of colorectal cancer cell lines. *PLoS one*. 2013; 8(3):e59689. <https://doi.org/10.1371/journal.pone.0059689> PMID: 23555746
59. Mayer S, Milo T, Isaacson A, Halperin C, Miyara S, Stein Y, et al. The tumor microenvironment shows a hierarchy of cell-cell interactions dominated by fibroblasts. *Nature communications*. 2023; 14(1):5810. <https://doi.org/10.1038/s41467-023-41518-w> PMID: 37726308
60. Feng B, Wu J, Shen B, Jiang F, Feng J. Cancer-associated fibroblasts and resistance to anticancer therapies: status, mechanisms, and countermeasures. *Cancer Cell International*. 2022; 22(1):166. <https://doi.org/10.1186/s12935-022-02599-7> PMID: 35488263
61. Glabman RA, Choyke PL, Sato N. Cancer-associated fibroblasts: Tumorigenicity and targeting for cancer therapy. *Cancers*. 2022; 14(16):3906. <https://doi.org/10.3390/cancers14163906> PMID: 36010899
62. Kim HS, Noh Y-K, Min K-W, Kim D-H, Kwon MJ, Pyo JS, et al. Cancer-Associated Fibroblasts Together with a Decline in CD8+ T Cells Predict a Worse Prognosis for Breast Cancer Patients. *Annals of Surgical Oncology*. 2024; 31(3):2114–26. <https://doi.org/10.1245/s10434-023-14715-6> PMID: 38093168
63. Rizzolio S, Giordano S, Corso S. The importance of being CAFs (in cancer resistance to targeted therapies). *Journal of Experimental & Clinical Cancer Research*. 2022; 41(1):319.
64. Mun S, Lee HJ, Kim P. Rebuilding the microenvironment of primary tumors in humans: a focus on stroma. *Exp Mol Med*. 2024; 56(3):527–48. <https://doi.org/10.1038/s12276-024-01191-5> PMID: 38443595
65. Costard LS, Hosn RR, Ramanayake H, O'Brien FJ, Curtin CM. Influences of the 3D microenvironment on cancer cell behaviour and treatment responsiveness: A recent update on lung, breast and prostate cancer models. *Acta Biomater*. 2021; 132:360–78. <https://doi.org/10.1016/j.actbio.2021.01.023> PMID: 33484910
66. Han C, Liu T, Yin R. Biomarkers for cancer-associated fibroblasts. *Biomarker Research*. 2020; 8:1–8.

67. Huang J, Zhang L, Wan D, Zhou L, Zheng S, Lin S, et al. Extracellular matrix and its therapeutic potential for cancer treatment. *Signal Transduction and Targeted Therapy*. 2021; 6(1):153. <https://doi.org/10.1038/s41392-021-00544-0> PMID: 33888679
68. Gonzalez-Avila G, Sommer B, Mendoza-Posada DA, Ramos C, Garcia-Hernandez AA, Falfan-Valencia R. Matrix metalloproteinases participation in the metastatic process and their diagnostic and therapeutic applications in cancer. *Critical reviews in oncology/hematology*. 2019; 137:57–83. <https://doi.org/10.1016/j.critrevonc.2019.02.010> PMID: 31014516
69. Niland S, Riscanevo AX, Eble JA. Matrix metalloproteinases shape the tumor microenvironment in cancer progression. *International journal of molecular sciences*. 2021; 23(1):146. <https://doi.org/10.3390/ijms23010146> PMID: 35008569
70. Maurya SK, Poddar N, Tandon P, Yadav AK. Matrix metalloproteinases (MMPs) in cancer initiation and progression. *Pathophysiological Aspects of Proteases*. 2017:207–36.
71. Peng K, Zhang Y, Liu D, Chen J. MMP2 is a immunotherapy related biomarker and correlated with cancer-associated fibroblasts infiltrate in melanoma. *Cancer Cell International*. 2023; 23(1):26. <https://doi.org/10.1186/s12935-023-02862-5> PMID: 36788565
72. Taguchi A, Kawana K, Tomio K, Yamashita A, Isobe Y, Nagasaka K, et al. Matrix metalloproteinase (MMP)-9 in cancer-associated fibroblasts (CAFs) is suppressed by omega-3 polyunsaturated fatty acids in vitro and in vivo. *PloS one*. 2014; 9(2):e89605. <https://doi.org/10.1371/journal.pone.0089605> PMID: 24586907
73. Linares J, Marín-Jiménez JA, Badia-Ramentol J, Calon A. Determinants and functions of CAFs secretome during cancer progression and therapy. *Frontiers in Cell and Developmental Biology*. 2021; 8:621070. <https://doi.org/10.3389/fcell.2020.621070> PMID: 33553157
74. Chen Y, McAndrews KM, Kalluri R. Clinical and therapeutic relevance of cancer-associated fibroblasts. *Nature reviews Clinical oncology*. 2021; 18(12):792–804. <https://doi.org/10.1038/s41571-021-00546-5> PMID: 34489603
75. Zhang C, Fei Y, Hu R, Du Q. CAFs orchestrates tumor immune microenvironment—A new target in cancer therapy? *Frontiers in Pharmacology*. 2023; 14:1113378. <https://doi.org/10.3389/fphar.2023.1113378> PMID: 37007004
76. Jalil AT, Abdulhadi MA, Al-Marzook FA, Hizam MM, Abdulameer SJ, Al-Azzawi AKJ, et al. NK cells direct the perspective approaches to cancer immunotherapy. *Medical Oncology*. 2023; 40(7):206. <https://doi.org/10.1007/s12032-023-02066-x> PMID: 37318610
77. Fantini M, Arlen PM, Tsang KY. Potentiation of natural killer cells to overcome cancer resistance to NK cell-based therapy and to enhance antibody-based immunotherapy. *Frontiers in Immunology*. 2023; 14:1275904. <https://doi.org/10.3389/fimmu.2023.1275904> PMID: 38077389
78. Ben-Shmuel A, Gruper Y, Levi-Galibov O, Rosenberg-Fogler H, Carradori G, Stein Y, et al. Cancer-associated fibroblasts serve as decoys to suppress NK cell anti-cancer cytotoxicity. *bioRxiv*. 2023: 2023.11.23.568355.
79. Lee YE, Go G-Y, Koh E-Y, Yoon H-N, Seo M, Hong S-M, et al. Synergistic therapeutic combination with a CAF inhibitor enhances CAR-NK-mediated cytotoxicity via reduction of CAF-released IL-6. *Journal for Immunotherapy of Cancer*. 2023; 11(2). <https://doi.org/10.1136/jitc-2022-006130> PMID: 36849201
80. Peipp M, Klausz K, Boje AS, Zeller T, Zielonka S, Kellner C. Immunotherapeutic targeting of activating natural killer cell receptors and their ligands in cancer. *Clinical and Experimental Immunology*. 2022; 209(1):22–32. <https://doi.org/10.1093/cei/uxac028> PMID: 35325068
81. Viel S, Marçais A, Guimaraes FS-F, Loftus R, Rabilloud J, Grau M, et al. TGF- $\beta$  inhibits the activation and functions of NK cells by repressing the mTOR pathway. *Science signaling*. 2016; 9(415):ra19–ra.
82. Mace TA, Ameen Z, Collins A, Wojcik S, Mair M, Young GS, et al. Pancreatic cancer-associated stellate cells promote differentiation of myeloid-derived suppressor cells in a STAT3-dependent manner. *Cancer research*. 2013; 73(10):3007–18. <https://doi.org/10.1158/0008-5472.CAN-12-4601> PMID: 23514705
